# Supplementary material
Source: Research Square preprint supplement (doi:10.21203/rs.3.rs-9150177/v1)
Supplement: Supplementary file 1 [file 4b6b2ae0bc328f5512b5a089.docx]

**ID:**

**Questionario sul Comportamento Alimentare dei Bambini (CEBQ)**

Leggere le seguenti affermazioni e spuntare le caselle più adatte al comportamento alimentare di vostro figlio.

|  | Mai | Raramente | A volte | Spesso | | Sempre |  |
| --- | --- | --- | --- | --- | --- | --- | --- |
| A mio figlio piace il cibo | □ | □ | □ | □ | □ | | EF |
| Mio figlio mangia di più quando è preoccupato | □ | □ | □ | □ | □ | | EOE |
| Mio figlio ha un grande appetito | □ | □ | □ | □ | □ | | SR* |
| Mio figlio finisce subito il suo pasto | □ | □ | □ | □ | □ | | SE* |
| Mio figlio è interessato al cibo | □ | □ | □ | □ | □ | | EF |
| Mio figlio chiede sempre da bere | □ | □ | □ | □ | □ | | DD |
| A prima vista, mio figlio rifiuta cibi nuovi | □ | □ | □ | □ | □ | | FF |
| Mio figlio mangia lentamente | □ | □ | □ | □ | □ | | SE |
| Mio figlio mangia di meno quando è arrabbiato | □ | □ | □ | □ | □ | | EUE |
| A mio figlio piace assaggiare cibi nuovi | □ | □ | □ | □ | □ | | FF* |
| Mio figlio mangia di meno quando è stanco | □ | □ | □ | □ | □ | | EUE |
| Mio figlio chiede sempre cibo | □ | □ | □ | □ | □ | | FR |
| Mio figlio mangia di più quando è scocciato | □ | □ | □ | □ | □ | | EOE |
| Se non lo controllassi, mio figlio mangerebbe troppo | □ | □ | □ | □ | □ | | FR |
| Mio figlio mangia di più quando è ansioso | □ | □ | □ | □ | □ | | EOE |
| A mio figlio piace mangiare molti alimenti di diverso tipo | □ | □ | □ | □ | □ | | FF* |
| Mio figlio lascia il cibo nel suo piatto a fine pasto | □ | □ | □ | □ | □ | | SR |
| Mio figlio impiega più di 30 minuti per finire un pasto | □ | □ | □ | □ | □ | | SE |

|  | Mai | Raramente | A volte | Spesso | Sempre |  |
| --- | --- | --- | --- | --- | --- | --- |
| Se potesse, mio figlio mangerebbe per la maggior parte del tempo | □ | □ | □ | □ | □ | FR |
| Mio figlio non vede l'ora di mangiare | □ | □ | □ | □ | □ | EF |
| Mio figlio si sazia prima che il suo pasto sia finito | □ | □ | □ | □ | □ | SR |
| A mio figlio piace mangiare | □ | □ | □ | □ | □ | EF |
| Mio figlio mangia di più quando è felice | □ | □ | □ | □ | □ | EUE |
| Mio figlio ha gusti alimentari difficili | □ | □ | □ | □ | □ | FF |
| Mio figlio mangia meno quando è turbato | □ | □ | □ | □ | □ | EUE |
| Mio figlio si sazia facilmente | □ | □ | □ | □ | □ | SR |
| Mio figlio mangia di più quando non ha nient’altro da fare | □ | □ | □ | □ | □ | EOE |
| Anche se è pieno, mio figlio trova sempre spazio per il suo cibo preferito | □ | □ | □ | □ | □ | FR |
| Se potesse, mio figlio berrebbe continuamente per tutto il giorno | □ | □ | □ | □ | □ | DD |
| Subito dopo uno spuntino, mio figlio non riesce a mangiare il suo pasto | □ | □ | □ | □ | □ | SR |
| Se glielo permettessi, mio figlio berrebbe sempre | □ | □ | □ | □ | □ | DD |
| Mio figlio è curioso di assaggiare cibi che non ha mai provato prima | □ | □ | □ | □ | □ | FF* |
| Anche senza averlo assaggiato, mio figlio decide che un cibo non gli piace | □ | □ | □ | □ | □ | FF |
| Se glielo permettessi, mio figlio starebbe sempre a mangiare | □ | □ | □ | □ | □ | FR |
| Mio figlio mangia sempre più lentamente durante il pasto | □ | □ | □ | □ | □ | SE |

**Punteggio del CEBQ**

**(Mai=1, Raramente=2, A volte=3, Spesso=4, Sempre=5)**

Food responsiveness = item mean FR

(Reazione al cibo)

Emotional over-eating = item mean EOE

(sovralimentazione emotiva)

Enjoyment of food = item mean EF

(Godimento del cibo)

Desire to drink = item mean DD

(Voglia di bere)

Satiety responsiveness = item mean SR

(Risposta alla sazietà)

Slowness in eating = item mean SE

(Lentezza nel mangiare)

Emotional under-eating = item mean EUE

(Poco desiderio di mangiare)

Food fussiness = item mean FF

(Alimentazione selettiva)

*Reversed items

Wardle, J, Guthrie CA, Sanderson, S and Rapoport, L. Development of the Children’s Eating Behaviour Questionnaire. *Journal of Child Psychology and Psychiatry.* **42,** 2001, 963-970.
